1  
2  
3  
4  
5  
6  
7  
8  
9  
10  
11  
12  
13  
14  
15  
16  
17  
18  
19  
20  
21  
22  
23  
24  
25  
26  
27  
28  
29  
30  
31  
32

## Keystone genes of mammalian tooth patterning and quantification of their expression

Outi Hallikas<sup>1\*</sup>, Rishi Das Roy<sup>1\*</sup>, Mona M. Christensen<sup>1</sup>, Elodie Renvoisé<sup>2,1</sup>, Ana-Marija Sulic<sup>1</sup>  
& Jukka Jernvall<sup>1</sup>

<sup>1</sup>Institute of Biotechnology, University of Helsinki, P.O. Box 56, FI-00014 Helsinki, Finland.

<sup>2</sup>5 Rue de Portland, 72100 Le Mans, France.

\*These authors contributed equally to this work.

Keywords: Tooth development, transcriptomes, keystone genes, single-cell RNAseq, transcript abundance

Running title: Quantification of keystone gene expression

### Abstract

Organ development is regulated by complex interactions of multiple regulatory pathways. These pathways (Wnt, Tgf $\beta$ , Fgf, Hh, Eda, Notch) are becoming increasingly better known, with many identified genes having well-characterized effects on the phenotype. We classify genes required for normal organogenesis into different categories that range from essential to subtle modification of the phenotype. We focus on the mouse tooth development in which over 70 genes are known to be required for normal odontogenesis. These genes were classified into progression, shape, and tissue categories based on whether their null mutations cause early developmental arrests, altered morphologies, or hard tissue defects, respectively. Collectively, we call these here the developmental keystone genes. Additionally, we identified 100 developmental genes with no phenotypic effects on molars when null mutated, thereby providing the means to contrast expression dynamics between keystone and non-keystone

33 genes. Transcriptome profiling using microarray and RNAseq analyses of patterning stage  
34 mouse molars show elevated expression levels for progression and shape genes, the former  
35 category showing the most significant upregulation. Single-cell RNAseq analyses reveal that  
36 even though the size of the expression domain, measured in number of cells, is the main driver  
37 of organ-level expression, the progression genes show high cell-level transcript abundances. In  
38 contrast, high proportion of the shape genes are secreted ligands that are found to be  
39 expressed in fewer cells than their receptors and intracellular components. Overall, we  
40 postulate that genes essential for the progression of organ patterning are characterized by high  
41 level of expression, whereas fine-tuning of the pattern is more dependent on spatially restricted  
42 production of ligands. The combination of phenotypically defined gene categories and  
43 transcriptomes allow the characterization of the expression dynamics underlying different  
44 aspects of organogenesis.

45

## 46 **Introduction**

47 Much of the functional evidence for the roles of developmental genes comes from natural  
48 mutants or experiments in which the activity of gene is altered. Most often these experiments  
49 involve deactivation, or null mutations where the production of a specific gene product is  
50 prevented altogether. In the cases where development of an organism is arrested altogether, the  
51 specific gene is considered to be absolutely required or essential for development (1, 2).  
52 Through a large number of experiments in different organisms, an increasingly nuanced view of  
53 developmental regulation has emerged showing that some genes appear to be absolutely  
54 required, whereas others may cause milder effects on the phenotype (3, 4). Yet, there are a large  
55 number of genes that despite being dynamically regulated during individual organ development,  
56 have no detectable phenotypic effect when null mutated.

57

58 Within the framework of distinct phenotypic outcomes of gene deactivation, it can be argued for  
59 a gradation from developmentally 'more essential' to 'less essential' genes. Collectively, these  
60 can be considered to be analogous to the keystone species concept used in ecology (5). These  
61 genes, which can be called 'developmental keystone genes', are not necessarily essential for  
62 development. Rather, compared to all the genes, developmental keystone genes exert a  
63 disproportional effect on the phenotype. To be operational, developmental keystone genes are  
64 defined within an organ (or individual) of interest. This organ focus also means that genes that  
65 have no effects in one organ may be critical for the development of another organ. Therefore, in

66 the context of evolution, both the organ specific regulation and protein function would be the  
67 targets of natural selection on keystone genes.

68

69 As large-scale analyses of transcriptomes result in expression profiles of thousands of genes, it  
70 is now possible to address whether there might be any systematic differences between the  
71 regulation of keystone and other genes during organogenesis. Here we address such differences  
72 using the mammalian tooth. Especially the development of the mouse molar is well  
73 characterized, with over 70 genes that are known to be individually required for normal tooth  
74 development (6, 7). The detailed effects of null mutations of these genes are also well  
75 characterized, ranging from a complete developmental arrest to relatively mild modifications of  
76 morphology, or defects in the mineralized hard tissue (6, 7).

77

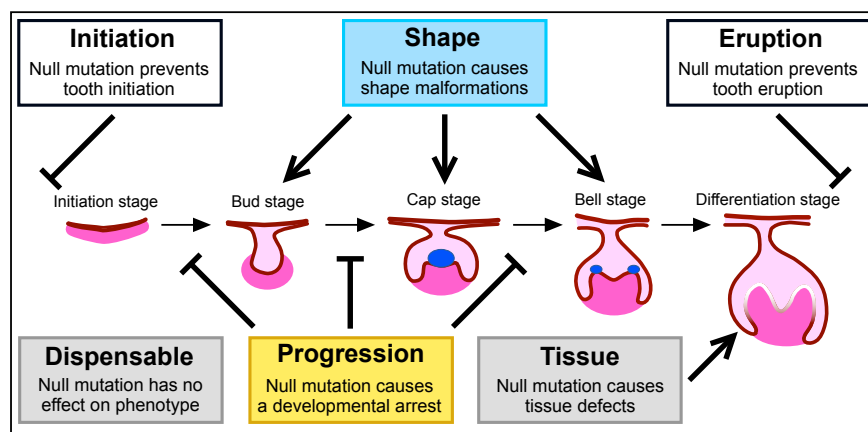

78

79 **Fig 1. Keystone gene categories of tooth development.** Mouse molar development progresses from  
80 initiation and patterning to formation of the hard tissues and eruption. These steps are mediated by  
81 reciprocal signaling between epithelium (lighter magenta) and mesenchyme (darker magenta). A central  
82 step in the patterning is the formation of the epithelial signaling center, the primary enamel knot (dark  
83 blue circle inside the cap stage tooth). Several genes are known to be required for the developmental  
84 progression and regulation of the shape around the time of cap stage, and here we analyzed  
85 transcriptomes in the bud (E13), cap (E14) and bell (E16) stage molars. Expression of progression and  
86 shape category genes were compared to tissue and dispensable genes, as also to other developmental  
87 process genes. Fewer initiation and eruption category genes are known, and they were excluded from the  
88 analyses. For listing of the genes, see Appendix S1 and Table S1.

89

90 **Classification of developmental keystone genes.**

91 Here our main focus is on a critical step in tooth development, namely the formation of the cap  
92 stage tooth germ (Fig. 1). At this stage the patterning of tooth crown begins, and the effects of  
93 experimental modifications in several signaling pathways first manifest themselves around this  
94 time of development (8). To classify the studied genes, we divide them into four different  
95 categories. The first category is the **progression category** containing genes that cause a  
96 developmental arrest of the tooth when null mutated (Fig. 1, genes with references in Appendix  
97 S1). The second set of genes belongs to the **shape category** and they alter the morphology of  
98 the tooth when null mutated. Unlike the progression genes, many of the shape gene caused  
99 modifications of teeth are subtle and functional, hence these genes are not strictly essential for  
100 tooth development. The third category is the **tissue category** and null mutations in these genes  
101 cause defects in the tooth hard tissues, enamel and dentine. Both the progression and shape  
102 categories include genes that are required for normal cap-stage formation. In contrast, the tissue  
103 category is principally related to the formation of extracellular matrix and these genes are  
104 known to be needed later in the development (9). Because there is more than a five-day delay  
105 from the cap-stage to matrix secretion in the mouse molar, here we considered the tissue  
106 category as a control for the first two categories. Additionally, we compiled a second control set  
107 of developmental genes that, while expressed during tooth development, are reported to lack  
108 phenotypic effects when null mutated (Table S1). This 'non-keystone' or **dispensable category**  
109 is defined purely within our operational framework of identifiable phenotypic effects and we do  
110 not imply that these genes are necessarily unimportant even within the context of tooth  
111 development. Many genes function in concert and the effects of their deletion only manifests  
112 when mutated in combinations (also known as synthetic mutations). We identified five such  
113 redundant pairs of paralogous genes and a single gene whose null phenotype surfaces in  
114 heterozygous background of its paralogue. Altogether these 11 genes were tabulated separately  
115 as a **double category**. In the progression, shape, tissue, and dispensable categories we tabulated  
116 15, 28, 27, and 100 genes respectively (Fig. 1, Appendix S1, Table S1). While still limited,  
117 these genes should represent a robust classification of validated experimental effects. We note  
118 that these groupings do not exclude the possibility that a progression gene, for example, can also  
119 be required for normal hard tissue formation. Therefore, the keystone gene categories can be  
120 considered to reflect the temporal order in which they are first required during odontogenesis.

121

122 In addition to the categories studied here, there are genes required for the initiation of tooth  
123 development, of which many are also potentially involved in tooth renewal. Because the  
124 phenotypic effect of these initiation genes on tooth development precedes the visible  
125 morphogenesis, and the phenotype might include complete lack of cells of the odontogenic  
126 lineage, we excluded these genes from our analyses. Similarly, we excluded genes preventing  
127 tooth eruption with no specific effect on the tooth itself (Appendix S1).

128

129 To examine the keystone genes in the context of whole transcriptomes, we compared the  
130 expression levels with all the developmental-process genes (GO:00332502, ref. 10), as also with  
131 all the other protein coding genes of the mouse genome.

132

## 133 **Results**

### 134 **Progression and shape category genes show elevated expression at the onset of tooth** 135 **patterning**

136 For a robust readout of gene expression profiles, we first obtained gene expression levels using  
137 both microarray and RNAseq techniques from E13 (bud stage) and E14 (cap stage) mouse  
138 molars (Materials and Methods). From dissected tooth germs we obtained five microarray and  
139 seven RNAseq replicates for both developmental stages. The results show that especially the  
140 progression category genes are highly expressed during E13 compared to the control gene sets  
141 (tissue, dispensable, and developmental-process categories,  $p$  values range from 0.0003 to  
142 0.0416 for RNAseq and microarray experiments, tested using random resampling, for details  
143 and all the tests, see Materials and Methods, Fig. 2, Tables S2, S3). Comparable differences are  
144 observed in E14 molars ( $p$  values range from 0.0000 to 0.05, Fig. 2, Tables S2, S3).

145

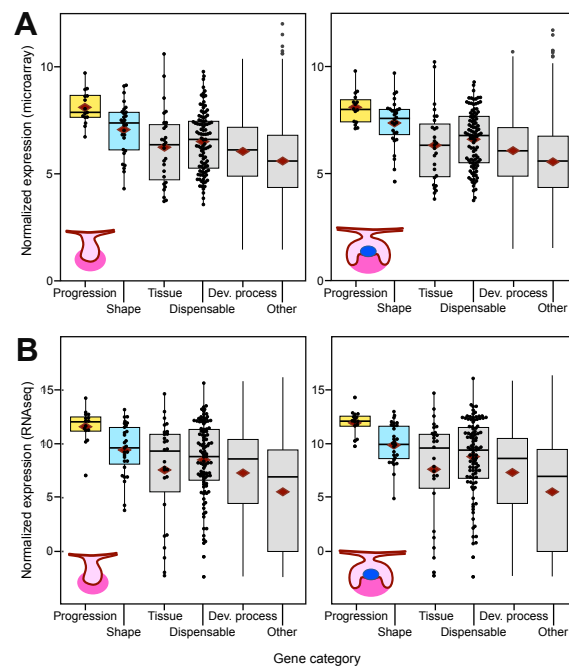

146

147 **Fig 2. Bud and cap stage mouse molars show elevated expression of keystone genes.** (A) Microarray  
148 and (B) RNAseq analyses of the transcriptomes of E13 and E14 molars show highly elevated expression  
149 of progression category and moderately elevated shape category genes (for tests, see Table S3). Tissue  
150 category genes are involved in dentine and enamel formation that begin at birth, around six days from  
151 the E14 cap stage. The number of genes having RNAseq expression data in each category are 15, 28, 27,  
152 100, 4106, and 16165 for progression, shape, tissue, dispensable, developmental process, and other,  
153 respectively. The corresponding numbers for the microarray data are 15, 28, 27, 98, 3983, and 14825.  
154 Boxes enclose 50% of observations; the median and mean are indicated with a horizontal bar and  
155 diamond, respectively, and whiskers extend to last values within 1.5 interquartiles. Individual data points  
156 are shown for the smaller categories.

157

158 In general, the expression differences between progression and tissue categories appear greater  
159 than between progression and dispensable categories ( $p$  values range from 0.0027 to 0.0416 and  
160 0.0055 to 0.05, respectively, Table S3), suggesting that some of the genes in the dispensable  
161 category may still play a functional role in tooth development. In our data we have 11 genes that  
162 cause a developmental arrest of the tooth when double mutated (Appendix S1). The expression  
163 level of this double-mutant category shows incipient upregulation compared to that of the  
164 developmental-process category ( $p$  values range from 0.0322 to 0.1796 Table S3), but not when  
165 compared to the tissue or dispensable categories ( $p$  values range from 0.0931 to 0.5007, Table  
166 S3). Therefore, it is plausible, based on the comparable expression levels between double and

167 dispensable categories, that many of the genes in the dispensable category may cause  
168 phenotypic effects when mutated in pairs.

169

170 Even though the shape category expression levels are lower than that of the progression  
171 category (Fig. 2), at least the E14 microarray data suggests elevated expression levels relative to  
172 all the other control categories ( $p$  values range from 0.0002 to 0.0383, Table S3). The  
173 moderately elevated levels of expression by the shape category genes could indicate that they  
174 are required slightly later in development, or that the most robust upregulation happens for  
175 genes that are critical for the progression of the development. The latter option seems to be  
176 supported by a RNAseq analysis of E16 molar, showing only slight upregulation of shape  
177 category genes in the bell stage (Table S3).

178

179 One complication of our expression level analyses is that these have been done at the whole  
180 organ level. Because many of the genes regulating tooth development are known to have  
181 spatially complex expression patterns within the tooth, cell-level examinations are required to  
182 decompose the patterns within the tissue.

183

#### 184 **Single-cell RNAseq reveals cell-level patterns of keystone genes**

185 Tooth development is punctuated by iteratively forming epithelial signaling centers, the enamel  
186 knots. The first, primary enamel knot, is active in E14 molar and at this stage many genes are  
187 known to have complex expression patterns. Some progression category genes have been  
188 reported to be expressed in the enamel knot, whereas others have mesenchymal or complex  
189 combinatorial expression patterns (8, 9). To quantify these expression levels at the cell-level, we  
190 performed a single-cell RNAseq (scRNAseq) on E14 molars (Material and Methods). We  
191 focused on capturing a representative sample of cells by dissociating the tooth germs without  
192 cell sorting ( $n = 4$ ). After data filtering, 7000 to 8811 cells per tooth were retained for the  
193 analyses, providing 30930 aggregated cells for a relatively good proxy of the E14 tooth  
194 (Material and Methods).

195

196

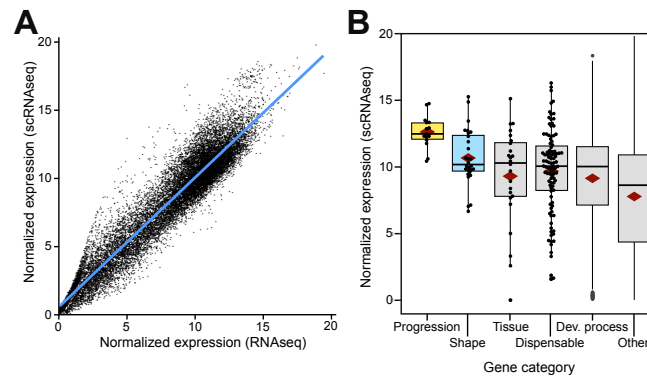

197

198 **Fig 3. Single cell RNAseq data reflect the bulkRNA analyses.** (A) Bulk and scRNAseq expression  
199 levels show overall correspondence in tissue level expression in E14 molar. (B) Progression category  
200 genes show the strongest upregulation whereas shape category is intermediate between the progression  
201 and other categories (for tests, see Table S3). Boxes in (B) enclose 50% of observations; the median and  
202 mean are indicated with a horizontal bar and diamond, respectively, and whiskers extend to last values  
203 within 1.5 interquartiles. Individual data points are shown for the smaller categories.

204

205 First we examined whether the scRNAseq produces comparable expression levels to our  
206 previous analyses. For the comparisons, the gene count values from the cells were summed up  
207 and treated as bulk RNAseq data (Fig. 3A, Material and Methods). We analyzed the expression  
208 levels of different gene categories as in the bulk data (Fig 2) and the results show a general  
209 agreement between the experiments (Fig. 2, 3B). As in the previous analyses (Table S3), the  
210 progression category shows the highest expression levels compared to the control gene sets ( $p$   
211 values range from 0.0076 to 0.0309, Table S3). Although the mean expression of the shape  
212 category is intermediate between progression and control gene sets, scRNAseq shape category  
213 is not significantly upregulated in the randomization tests ( $p$  values range from 0.7825 to  
214 0.9971). This pattern reflects the bulk RNAseq analyses while the microarray data showed  
215 stronger upregulation (Fig. 2), suggesting a potentially discernable but subtle upregulation of  
216 shape category genes.

217

218 Unlike the bulk transcriptome data, the scRNAseq data can be used to quantify the effect of size  
219 expression domain size. The importance of expression domain size is well evident in the  
220 scRNAseq data when we calculated the number of cells that express each gene (Material and  
221 Methods). The data shows that the overall tissue level gene expression is highly correlated with  
222 the cell population size (Fig. 4A). In other words, the size of the expression domain is the key



223 driver of expression levels measured at the whole tissue level.

224

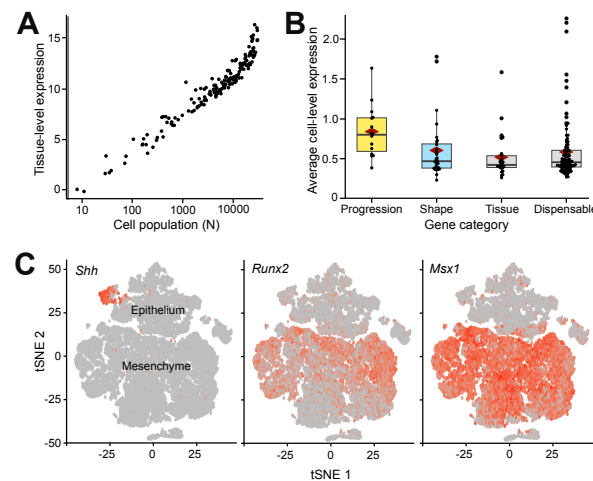

225

226 **Fig 4. Expression domain size and high cell-level transcript abundance of progression genes. (A)**

227 The size of the expression domain, measured as the number of cells, is the key driver of expression

228 levels measured at the whole tissue level. (B) Progression category shows high cell-level expression or

229 transcript abundance, indicating high expression relative to the expression domain size. The  $p$  values for

230 progression, shape, and tissue categories compared to dispensable category are 0.0008, 0.7009, 0.3413,

231 respectively (one-tailed significance levels obtained using 10 000 permutations). (C) tSNE plots showing

232 diverse expression patterns of three different progression category genes in the scRNAseq data. Boxes in

233 (B) enclose 50% of observations; the median and mean are indicated with a horizontal bar and diamond,

234 respectively, and whiskers extend to last values within 1.5 interquartiles.

235

236 To examine the cell level patterns further, we calculated the mean transcript abundances for

237 each gene for the cells that express that gene (see Material and Methods). This metric

238 approximates the cell-level upregulation of a particular gene, and is thus independent of the size

239 of the expression domain. We calculated the transcript abundance values for each gene in each

240 cell that expresses progression, shape, tissue, double, and dispensable gene categories. The

241 resulting mean transcript abundances were contrasted to that of the dispensable category

242 (Material and Methods). The results show that the average transcript abundance is high in the

243 progression category whereas the other categories show roughly comparable transcript

244 abundances (Fig. 4B). Considering that the progression category genes have highly

245 heterogeneous expression patterns (e.g., Fig. 4C), their high cell-level transcript abundance (Fig.

246 4B) is suggestive about the critical role of these genes at the cell level. That is, progression

247 category genes are not only highly expressed at the tissue level because they have broad  
248 expression domains, but rather because they are upregulated in individual cells irrespective of  
249 domain identity or size. These results suggest that high cell-level transcript abundance is a  
250 characteristic feature of genes essential for the progression of tooth patterning. We note that  
251 although the dispensable category has several genes showing comparable expression levels with  
252 that of the progression category genes at the tissue level (Fig. 2), their cell-level transcript  
253 abundances are predominantly low (Fig. 4B).

254

255 Next we examined more closely the differences between progression and shape category genes,  
256 and to what extent the upregulation of the keystone genes reflect the overall expression of the  
257 corresponding pathways.

258

### 259 **Keystone gene upregulation in the context of their pathways**

260 In our data the developmental-process genes appear to have slightly elevated expression levels  
261 compared to the other protein coding genes (Figs 2, 3B), suggesting an expected and general  
262 recruitment of the pathways required for organogenesis. To place the progression and shape  
263 category genes into the specific context of their corresponding pathways, we investigated  
264 whether the pathways implicated in tooth development show elevated expression levels. Six  
265 pathways, Fgf, Wnt, Tgf $\beta$ , Hedgehog (Hh), Notch, and Ectodysplasin (Eda), contain the  
266 majority of progression and shape genes (Materials and Methods). First we used the RNAseq of  
267 E14 stage molars to test whether these pathways show elevated expression levels. We manually  
268 identified 272 genes belonging to the six pathways (Materials and Methods, Table S4).

269 Comparison of the median expression levels of the six-pathway genes with the developmental-  
270 process genes shows that the pathway genes are a highly upregulated set of genes (Fig. 5A,  $p <$   
271 0.0001, random resampling). This difference suggests that the experimentally identified  
272 progression and shape genes might be highly expressed partly because they belong to the  
273 developmentally upregulated pathways. To specifically test this possibility, we contrasted the  
274 expression levels of the progression and shape genes to the genes of their corresponding  
275 signaling families.

276

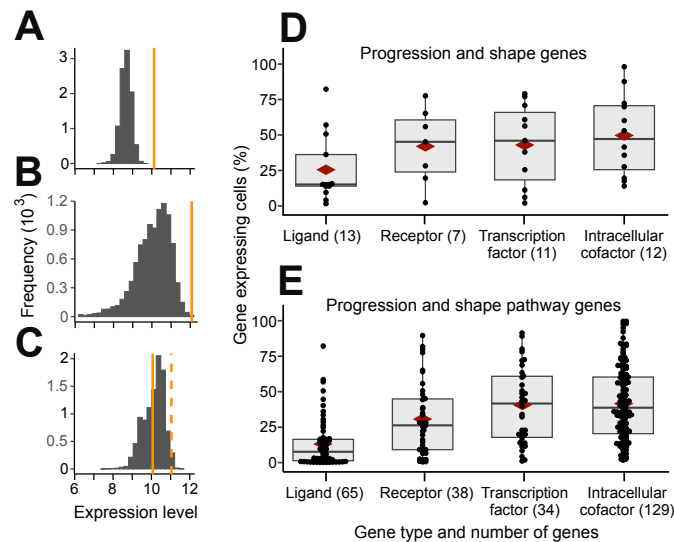

277

278 **Fig 5. Restricted expression of ligands explains differences in upregulation.** (A) Compared to all the  
279 developmental process genes, the pathways containing progression and shape category genes are  
280 generally upregulated ( $p < 0.0001$ , orange line, random sampling using median expression levels and 10  
281 000 permutations). (B) Median expression of progression genes (orange line) shows further upregulation  
282 compared to all the genes in the corresponding pathways ( $p = 0.0004$ ). (C) Median expression of shape  
283 category genes (orange line) shows comparable expression with the genes in the corresponding pathways  
284 ( $p = 0.5919$ ), but excluding ligands makes the shape category genes highly expressed ( $p = 0.0154$ ,  
285 orange dashed line). (D) Of the progression and shape category genes, ligands are expressed in fewer  
286 number of cells compared to the non-secreted genes. (E) Ligands are also expressed in relatively few  
287 cells among all the pathway genes. The  $p$  value for ligands in (D) and (E) are  $p < 0.0001$  (random  
288 sampling compared to all the other gene types). Boxes in (D, E) enclose 50% of observations; the  
289 median and mean are indicated with a horizontal bar and diamond, respectively, and whiskers extend to  
290 last values within 1.5 interquartiles.

291

292 The 15 progression category genes belong to four signaling families (Wnt, Tgf $\beta$ , Fgf, Hh) with  
293 221 genes in our tabulations. Even though these pathways are generally upregulated in the E14  
294 tooth, the median expression level of the progression category is still further elevated (Fig. 5B,  $p$   
295  $< 0.0001$ ). In contrast, the analyses for the 28 shape category genes and their corresponding  
296 pathways (272 genes from Wnt, Tgf $\beta$ , Fgf, Hh, Eda, Notch) show comparable expression levels  
297 (Fig. 5C,  $p = 0.5919$ ). Whereas this contrasting pattern between progression and shape genes  
298 within their pathways may explain the subtle upregulation of the shape category (Fig. 2), the  
299 difference warrants a closer look. Examination of the two gene categories reveals that compared  
300 to the progression category genes, relatively large proportion of the shape category genes are

301 ligands (36% shape genes compared to 20% progression genes, Appendix S1). In our scRNAseq  
302 data, ligands show generally smaller expression domains than other genes (roughly by half, Fig.  
303 5D, E), and the low expression of the shape category genes seems to be at least in part driven by  
304 the ligands (Fig. 5C, Table S5).

305

306 Overall, the upregulation of the keystone genes within their pathways appears to be influenced  
307 by the kind of proteins they encode. In this context it is noteworthy that patterning of tooth  
308 shape requires spatial regulation of secondary enamel knots and cusps, providing a plausible  
309 explanation for the high proportion of genes encoding diffusing ligands in the shape category.

310

### 311 **Discussion**

312 Identification and mechanistic characterization of developmentally essential or important genes  
313 has motivated a considerable research effort (e.g. 1–4, 6). One general realization has been that  
314 despite the large number of genes being dynamically expressed during organogenesis, only a  
315 subset appears to have discernable effects on the phenotype. This parallels with the keystone  
316 species concept used in ecological research (5). Keystone species, that may include relatively  
317 few species in a community, are thought to have disproportionately large influence on their  
318 environment. Similarly, developmental keystone genes have disproportionately large effects on  
319 the phenotypic outcome of their system. Here we considered keystone genes strictly within a  
320 developmental system, and these genes, or more accurately their protein products, can be  
321 understood as keystone resources (11) that are required for normal development. We note that  
322 whereas keystone genes can also be considered within the context of their effects on ecosystems  
323 (12), here we limit the explanatory level to a specific organ system. In our case, the 'ecosystem'  
324 has been a developing mammalian tooth.

325

326 We took advantage of the in-depth knowledge on the details of the phenotypic effects of various  
327 developmental genes (Appendix S1). This allowed us to classify genes into different categories  
328 that reflect their functional role during organogenesis. Furthermore, a multitude of studies have  
329 made it possible to identify a dispensable or non-keystone gene category. Obviously, as in  
330 ecological data, our category groupings can be considered a work in progress as new genes and  
331 reclassifications are bound to refine the patterns. Nevertheless, our analyses should provide  
332 some robust inferences.

333

334 Most notably, genes that are individually required for the progression of mouse molar  
335 development were found to be highly expressed (Figs 2, 3). These genes were highly expressed  
336 even within their pathways (Fig. 5A,B) and had markedly high cell-level transcript abundances  
337 (Fig. 4B). The high expression level of these progression category genes may well signify their  
338 absolute requirement during the cap stage of tooth development. Indeed, it is typically by this  
339 stage that a developmental arrest happens when many of the progression genes are null mutated.  
340 Interestingly, mice heterozygous for the null-mutated progression genes appear to have normal  
341 teeth (Appendix S1). A possible hypothesis to be explored is to examine whether the high cell-  
342 level transcript abundance of the progression category is a form of haplosufficiency in which the  
343 developmental system is buffered against mutations affecting one allele. Another possibility,  
344 that has some experimental support (13), is that there are regulatory feedbacks to boost gene  
345 expression to compensate for a null-allele. In contrast to the progression category, gene pairs  
346 arresting tooth development as double mutants have relatively low expression levels, perhaps  
347 suggestive that many genes in the dispensable category could be redundant to each other.

348

349 Evolutionarily, because all the studied progression and shape category genes are involved in the  
350 development of multiple organ systems, our results may point to cis-regulatory differences that  
351 specifically promote the expression of these genes in an organ specific manner. Consequently,  
352 species that are less reliant on teeth (e.g., some seals) or have rudimentary teeth (e.g., baleen  
353 whales) can be predicted to have lowered expression levels of the progression genes. At an  
354 organism level, our gene categories should not be considered as indicative of having simple  
355 effects on individual fitness. For example, in our specific case of teeth, defects on enamel may  
356 be more costly for the mammalian parent than, for example, a dominant null mutation causing  
357 an arrest of tooth development with comparable defects on other organ systems.

358

359 Considering the numerous genes expressed in a developing organ system, our results point to  
360 the potential to use cell-level expression levels to identify other genes critical for organogenesis.  
361 Here the single-cell transcriptomes provided a more nuanced view into the spatial patterns of the  
362 different gene categories than the tissue level transcriptomes alone. In our tabulation over a third  
363 of the shape category genes were ligands. Tooth shape patterning involves spatial placement of  
364 signaling centers that in turn direct the growth and folding of the tissue (8). The involvement of

365 several secreted ligands in this patterning process, and consequently in the shape category, is  
366 likely to reflect the requirement of the developmental machinery to produce functional cusp  
367 patterns. These cusp patterns are also a major target of natural selection because evolutionary  
368 diversity of mammalian teeth is largely made from different configurations of cusps. At the  
369 same time, partly due to ligands having generally more restricted expression domains compared  
370 to receptors and intracellular proteins, the shape category expression levels were found to be  
371 generally lower than that of the progression category. That ligands tend to have smaller  
372 expression domains whereas receptors have broader expression domains for tissue competence  
373 has been recognized in many individual studies (e.g. refs 14 and 15, and partly in 16), but our  
374 analyses suggest that this is a general principle detectable in large-scale transcriptome data. This  
375 pattern is also compatible with the classic concepts of tissue competence and evocators or  
376 signals produced by organizers (17). Nevertheless, it remains to be explored how the low signal-  
377 competence ratio emerges from highly heterogeneous expression domains of various genes. In  
378 our data, at least the ligand *Eda* is expressed in a larger number of cells than its receptor *Edar*,  
379 suggesting that there are individual exceptions to the general pattern. Another potentially  
380 interesting observation is that *Sostdc1* and *Fst*, both secreted sequesters or inhibitors of  
381 signaling, were among the most broadly expressed of the ligands. Thus, at least some of the  
382 exceptions to the low signal-competence ratio may be modulators of tissue competence.

383

384 In conclusion, genes critical for tooth patterning are highly expressed, but the level of  
385 upregulation is influenced by the kind of proteins they encode. Combining phenotypic  
386 classifications of the roles of genes in development with transcriptomes enables new ways to  
387 integrate experimental data with development. With advances in the analyses of transcriptomes  
388 and gene regulation, it will be possible to explore experimental data from other organs and  
389 species to test and identify system level principles of organogenesis.

390

## 391 **Material and Methods**

392 **Classification of genes.** We performed extensive literature review of genes that are expressed in  
393 developing tooth. The genes were divided into categories based on the effect that their null  
394 mutation has on the development of the first mandibular molar in the mouse. Full null-mutant  
395 mouse information was used whenever available. Because many developmental genes function  
396 in multiple organs and stages during development, full null mutants of several genes are lethal

397 before tooth development even begins. Therefore, we also used information based on the tooth  
398 phenotypes of conditional mutant mice (in eight cases, Appendix S1). The effect of conditional  
399 mutants can be milder and in our data we have four shape genes that could potentially be in the  
400 progression category. To test for overall the robustness of the patterns, we analyzed the  
401 expression levels also after combining the progression and shape category genes, and the pattern  
402 of overall upregulation remained largely the same.

403

404 Genes that are individually indispensable for normal tooth development were classified as  
405 keystone genes. Conversely, genes, which loss-of-function mutation has no effect on tooth  
406 development are non-keystone genes. The tabulation of these dispensable genes was done from  
407 published reports and by inspecting published figures and data. Keystone genes were further  
408 divided into four categories based on the type of effect their loss of function has on tooth  
409 development. The progression category is defined by a null mutant phenotype that is a  
410 developmental arrest of the tooth. The shape category has the genes whose null mutations alter  
411 the morphology (or shape) of the tooth. The tissue category contains the genes whose null  
412 mutations cause defects in the tooth hard tissues. Only the progression genes can be considered  
413 essential for organ development per se, whereas the effects of many of the shape category genes  
414 can be quite subtle.

415

416 We created a manually curated list of genes in the six key pathways (Wnt, Tgf $\beta$ , Fgf, Hh, Eda,  
417 Notch) based on review publications and allocated the keystone genes into these pathways  
418 where appropriate. The keystone genes, non-keystone genes, and the pathway genes were also  
419 classified as ‘ligand (signal)’, ‘receptor’, ‘intracellular molecule’, ‘transcription factor’ or  
420 ‘other’. Because these kinds of classifications are not always trivial as some biological  
421 molecules have multiple functions in the cell, we used the inferred primary role in teeth. The  
422 developmental-process genes with GO term “GO:0032502” and experimental evidence codes  
423 were obtained from R package “org.Mm.eg.db” (18). Only curated RefSeq genes are used in  
424 this study. All tabulations are in Appendix S1 and Table S1, and S4.

425

426 **Ethics statement.** All mouse studies were approved and carried out in accordance with the  
427 guidelines of the Finnish national animal experimentation board under licenses KEK16-021,  
428 ESAVI/2984/04.10.07/2014 and ESAV/2363/04.10.07/2017.



429

430 **Dissection of teeth.** Wild type tooth germs were dissected from embryonic stages  
431 corresponding to E13, E14 and E16 molar development. For bulk and single-cell RNAseq we  
432 used C57BL/6J0laHsd mice, and for microarray we used NMRI mice. Minimal amount of  
433 surrounding tissue was left around the tooth germ, at the same time making sure that the tooth  
434 was not damaged in the process. The tissue was immediately stored in RNAlater (Qiagen  
435 GmbH, Hilden, Germany) for RNAseq or in TRI Reagent (Merck, Darmstadt, Germany) in -  
436 80°C for microarray. For microarray, a few tooth germs were pooled for each sample and five  
437 biological replicas were made. For RNAseq, each tooth was handled individually and seven  
438 biological replicates were made. Numbers of left and right teeth were balanced.

439

440 **RNA extraction.** The tooth germ was homogenised into TRI Reagent (Merck, Darmstadt,  
441 Germany) using Precellys 24 -homogenizer (Bertin Instruments, Montigny-le-Bretonneux,  
442 France). The RNA was extracted by guanidium thiocyanate-phenol-chloroform method and then  
443 further purified by RNeasy Plus micro kit (Qiagen GmbH, Hilden, Germany) according to  
444 manufacturer's instructions. The RNA quality was assessed for some samples with 2100  
445 Bioanalyzer (Agilent, Santa Clara, CA) and all the RIN values were above 9. The purity of  
446 RNA was analysed by Nanodrop microvolume spectrophotometer (ThermoFisher Scientific,  
447 Waltham, USA). RNA concentration was measured by Qubit 3.0 Fluorometer (ThermoFisher  
448 Scientific, Waltham, USA). The cDNA libraries were prepared with Ovation Mouse Universal  
449 RNAseq System (Tecan, Zürich, Switzerland).

450

451 **Bulk RNA expression analysis.** Gene expression levels were measured both in microarray  
452 (Affymetrix Mouse Exon Array 1.0, GPL6096) and RNAseq (platforms GPL19057, Illumina  
453 NextSeq 500). The microarray gene signals were normalized with aroma.affymetrix (19)  
454 package using Brainarray custom CDF (Version 23, released on Aug 12, 2019) (20). Whereas  
455 the RNAseq reads (84 bp) were evaluated and bad reads are filtered out using FastQC (21),  
456 AfterQC (22) and Trimmomatic (23). This has resulted into on average 63 millions reads per  
457 sample. Then good reads were aligned with STAR (24) to (GRCm38/mm10/Ensembl release 90  
458 - August 2017) and counts for each gene was performed by HTSeq (25) tool. On average 85%  
459 of reads were uniquely mapped to the genome.

460



461 **Single cell RNA sequencing.** Each tooth was processed individually in the single-cell  
462 dissociation. The tooth germ was treated with 0.1 mg/ml liberase (Roche, Basel, Switzerland)  
463 in Dulbecco's solution for 15 min at 28°C in shaking at 300 rpm followed by gentle pipetting to  
464 detach the mesenchymal cells. Then the tissue preparation was treated with TrypLE Select (Life  
465 Technologies, Waltham, USA) for 15 min at 28°C in shaking at 300 rpm followed by gentle  
466 pipetting to detach the epithelial cells. The cells were washed once in PBS with 0,04% BSA.  
467 The cells were resuspended in 50 µl PBS with 0.04% BSA. We used the Chromium single cell  
468 3' library & gel bead Kit v3 (10x Genomics, Pleasanton, USA). In short, all samples and  
469 reagents were prepared and loaded into the chip. Then, Chromium controller was used for  
470 droplet generation. Reverse transcription was conducted in the droplets. cDNA was recovered  
471 through emulsification and bead purification. Pre-amplified cDNA was further subjected to  
472 library preparation. Libraries were sequenced on an Illumina Novaseq 6000 (Illumina, San  
473 Diego, USA). All the sequencing data are available in GEO under the accession number  
474 (*<accession numbers go here>*).

475  
476 **Data analysis.** For scRNAseq, 10x Genomics Cell Ranger v3.0.1 pipelines were used for data  
477 processing and analysis. The “cellranger mkfastq” was used to produce fastq files and  
478 “cellranger count” to perform alignment, filtering and UMI counting. Alignment was done  
479 against mouse genome GRCm38/mm10. The resultant individual count data were finally  
480 aggregated with “cellranger aggr”. Further, the filtered aggregated feature-barcode matrix was  
481 checked for quality and normalization using R package Seurat (26). Only cells with  $\geq 20$  genes  
482 and genes expressed in at least 3 cells were considered for all the downstream analysis. For a  
483 robust set of cells for the expression level calculations, we limited the analyses to 30930 cells  
484 that had transcripts from 3000 to 9000 genes (7000 to 180000 unique molecular identifiers) with  
485 less than 10% of the transcripts being mitochondrial. For comparison with bulk RNAseq data  
486 (Figs 3), single-cell data was normalized with DeSeq2 (27) together with the corresponding bulk  
487 RNAseq samples, and median expression levels were plotted. The average cell-level expression  
488 (Fig. 4B) of a gene  $X$  was calculated as

489 
$$X = \frac{\sum_{k=1}^n NX_k}{\sum [NX_k > 1]}$$

490 where  $NX_k$  is normalized expression of gene  $X$  in cell  $k$  and the denominator is the count of cells  
491 with non-zero reads. All statistical tests corresponding to Tables S3 and S4 were performed

492 using R package “rcompanion” (28) and custom R scripts.

493

## 494 **Acknowledgements**

495 We thank I. Salazar-Ciudad and S. F. Gilbert for advice and the members of the Center of  
496 Excellence in Experimental and Computational Developmental Biology Research for  
497 discussions. We thank A. Viherä for technical assistance. We thank P. Auvinen, L. Paulin and P.  
498 Laamanen at DNA Sequencing and Genomics Laboratory for bulk RNA sequencing. We thank  
499 J. Lahtela at FIMM Single Cell Analytics for single cell RNA sequencing. Financial support  
500 was provided by the Academy of Finland, and Jane and Aatos Erkkö Foundation.

501

## 502 **References**

- 503 1. Amsterdam, A. Nissen, R. M., Sun, Z., Swindell, E. C., Farrington, S. & Hopkins, N. Identification  
504 of 315 genes essential for early zebrafish development. *Proc. Nat. Acad. Sci. USA* **101**, 12792–  
505 12797 (2004).
- 506 2. Dickinson M. E. *et al.* High-throughput discovery of novel developmental phenotypes. *Nature* **537**,  
507 508–514 (2016).
- 508 3. Brown, S. D. M. *et al.* High-throughput mouse phenomics for characterizing mammalian gene  
509 function. *Nat. Rev. Genet.* **19**, 357–370 (2018).
- 510 4. Bogue, M. A. *et al.* Mouse Phenome Database: an integrative database and analysis suite for curated  
511 empirical phenotype data from laboratory mice. *Nucleic Acids Res.* **46**, D843 (2018).
- 512 5. Paine, R. T. A Note on Trophic Complexity and Community Stability. *Am. Nat.* **103**, 91–93 (1969).
- 513 6. Nieminen, P. Genetic basis of tooth agenesis. *J. Exp. Zool. Part B Mol. Dev. Evol.* **312B**, 320–342  
514 (2009).
- 515 7. Harjunmaa, E. *et al.* On the difficulty of increasing dental complexity. *Nature* **483**, 324–327 (2012).
- 516 8. Jernvall, J. & Thesleff, I. Tooth shape formation and tooth renewal: evolving with the same signals.  
517 *Development* **139**, 3487–97 (2012).
- 518 9. Nieminen, P., Pekkanen, M., Aberg, T. & Thesleff, I. A graphical WWW-database on gene  
519 expression in tooth. *Eur. J. Oral Sci.* **106 Suppl 1**, 7–11 (1998).
- 520 10. Ashburner, M. *et al.* Gene Ontology: tool for the unification of biology. *Nat. Genet.* **25**, 25–29  
521 (2000).
- 522 11. Terborgh, J. Keystone plant resources in the tropical forest. in *Conservation Biology: The Science of*  
523 *Scarcity and Diversity* (ed. Soulé, M. E.) 330–344 (Sinauer Associates, 1986).
- 524 12. Skovmand, L. H. *et al.* Keystone Genes. *Trends Ecol. Evol.* **33**, 689–700 (2018).

- 525 13. Benazet, J.-D. *et al.* A Self-Regulatory System of Interlinked Signaling Feedback Loops Controls  
526 Mouse Limb Patterning. *Science* (80-. ). **323**, 1050–1053 (2009).
- 527 14. Bachler, M. & Neubüser, A. Expression of members of the Fgf family and their receptors during  
528 midfacial development. *Mech. Dev.* **100**, 313–6 (2001).
- 529 15. Wessells, R. J., Grumbling, G., Donaldson, T., Wang, S. H. & Simcox, A. Tissue-specific regulation  
530 of vein/EGF receptor signaling in Drosophila. *Dev. Biol.* **216**, 243–59 (1999).
- 531 16. Salvador-Martínez, I. & Salazar-Ciudad, I. How complexity increases in development: An analysis  
532 of the spatial-temporal dynamics of 1218 genes in Drosophila melanogaster. *Dev. Biol.* **405**, 328–39  
533 (2015).
- 534 17. Waddington, C. H. Organisers and Genes. (Cambridge biological studies, University Press, 1940).
- 535 18. Carlson, M. org.Mm.eg.db: Genome wide annotation for Mouse. (2019).
- 536 19. Bengtsson, H., Irizarry, R., Carvalho, B. & Speed, T. P. Estimation and assessment of raw copy  
537 numbers at the single locus level. *Bioinformatics* **24**, 759–67 (2008).
- 538 20. Dai, M. *et al.* Evolving gene/transcript definitions significantly alter the interpretation of GeneChip  
539 data. *Nucleic Acids Res.* **33**, e175–e175 (2005).
- 540 21. Andrews, S. *et al.* {FastQC}. (2012).
- 541 22. Chen, S. *et al.* AfterQC: automatic filtering, trimming, error removing and quality control for fastq  
542 data. *BMC Bioinformatics* **18**, 80 (2017).
- 543 23. Bolger, A. M., Lohse, M. & Usadel, B. Trimmomatic: a flexible trimmer for Illumina sequence  
544 data. *Bioinformatics* **30**, 2114–2120 (2014).
- 545 24. Dobin, A. *et al.* STAR: ultrafast universal RNA-seq aligner. *Bioinformatics* **29**, 15–21 (2013).
- 546 25. Anders, S., Pyl, P. T. & Huber, W. HTSeq--a Python framework to work with high-throughput  
547 sequencing data. *Bioinformatics* **31**, 166–169 (2015).
- 548 26. Stuart, T. *et al.* Comprehensive Integration of Single-Cell Data. *Cell* **177**, 1888-1902.e21 (2019).
- 549 27. Love, M. I., Huber, W. & Anders, S. Moderated estimation of fold change and dispersion for RNA-  
550 seq data with DESeq2. *Genome Biology* **15**, 550 (2014).
- 551 28. Mangiafico, S. rcompanion: Functions to Support Extension Education Program Evaluation. R  
552 package version 2.3.0. <https://CRAN.R-project.org/package=rcompanion> (2019).

553

554
